# Supplementary material for: Molecular Implication of PP2A and Pin1 in the Alzheimer's Disease Specific Hyperphosphorylation of Tau
Source: PubMed Central journal article supplement (PMC3121875; doi:10.1371/journal.pone.0021521), 2011-06-23

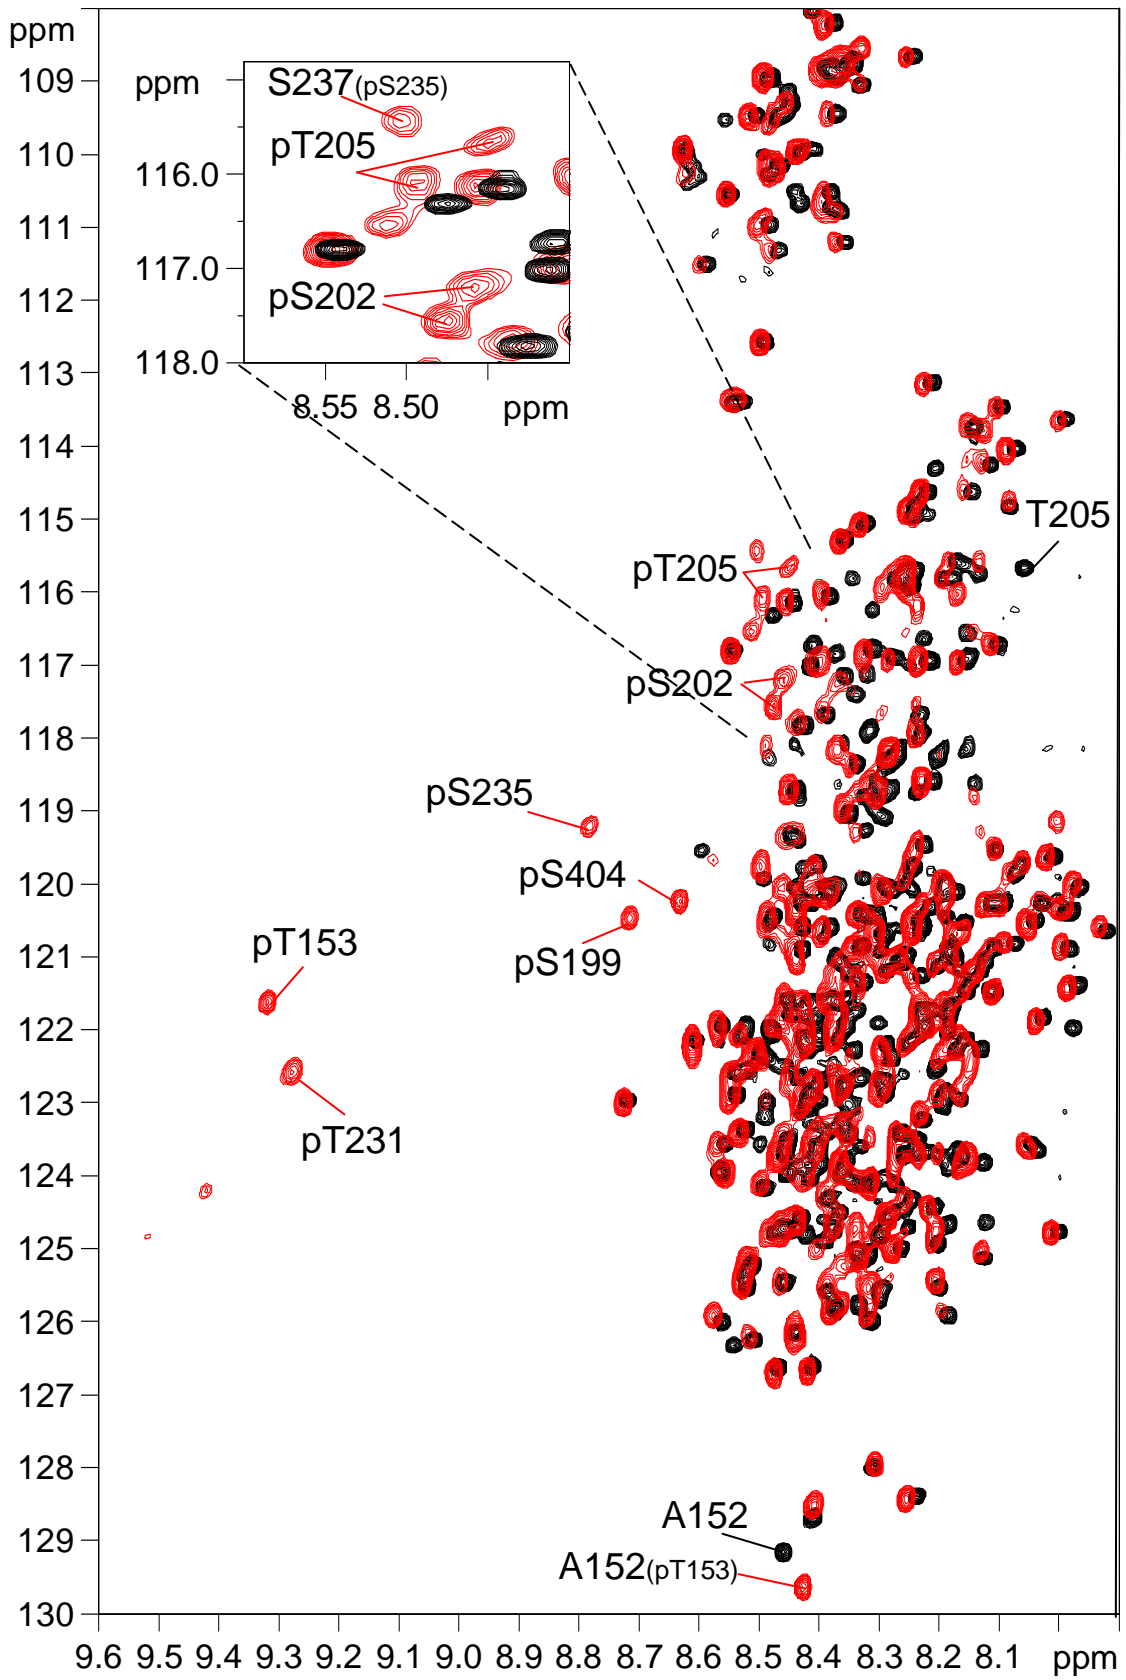

Supplement: pone.0021521.s001.pdf [file pone.0021521.s001.pdf]
