# Supplementary material for: Molecular Implication of PP2A and Pin1 in the Alzheimer's Disease Specific Hyperphosphorylation of Tau
Source: PubMed Central journal article supplement (PMC3121875; doi:10.1371/journal.pone.0021521), 2011-06-23

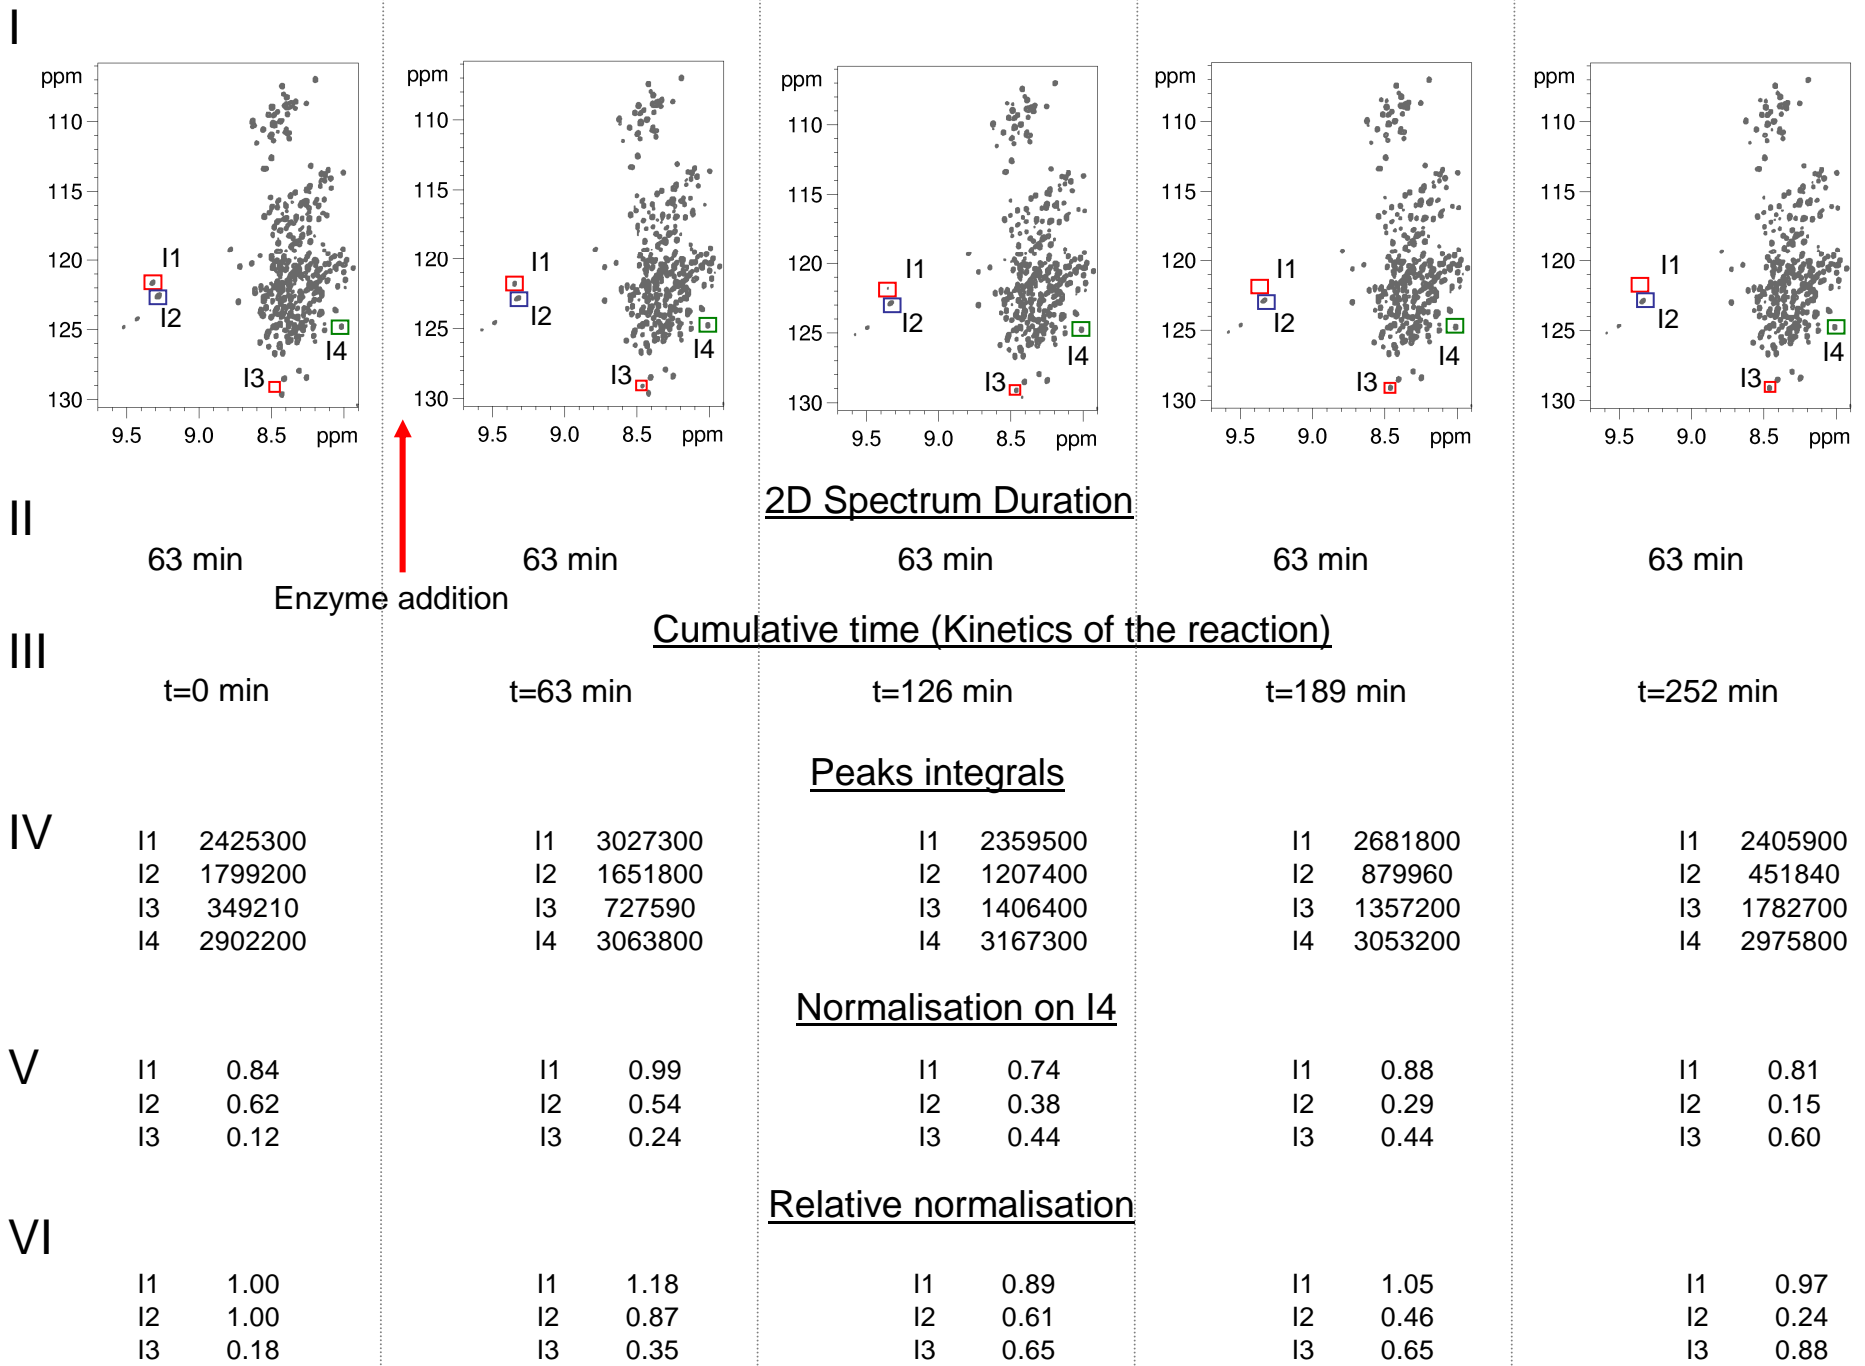

Data summary: first five points of the serie reported in Fig. 2 and 4

|    |       | 0 min. | 63 min. | 126 min. | 189 min. | 252 min. |
|----|-------|--------|---------|----------|----------|----------|
| I1 | pT231 | 1.00   | 1.18    | 0.89     | 1.05     | 0.97     |
| I2 | pT153 | 1.00   | 0.87    | 0.46     | 0.46     | 0.24     |
| I3 | A152  | 0.18   | 0.35    | 0.65     | 0.65     | 0.88     |

Fitting of the data with an exponential curve

|                                  | 0 min. | 63 min. | 126 min. | 189 min. | 252 min. |
|----------------------------------|--------|---------|----------|----------|----------|
| <b>pT153</b>                     |        |         |          |          |          |
| $0.8 * (e^{-(t/170)}) + 0.2$     | 1.00   | 0.75    | 0.58     | 0.46     | 0.38     |
| <b>A152</b>                      |        |         |          |          |          |
| $1 - (0.8 * e^{-(t/150)}) - 0.1$ | 0.10   | 0.37    | 0.55     | 0.67     | 0.75     |

Graphical summary: first five points of the serie reported in Fig. 2

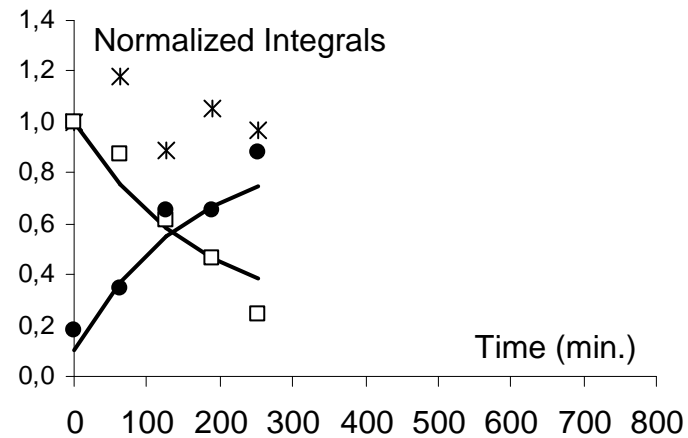

Supplement: pone.0021521.s003.pdf [file pone.0021521.s003.pdf]
